# Supplementary material for: Impact of Infection Control on Prevalence of Surgical Site Infections in a Large Tertiary Care Hospital in Haiphong City
Source: MDPI journal article supplement (doi:10.3390/antibiotics12010023), 2022-12-23
Supplement: s1 [file s1]

**Figure S1:** A sterile set for skin preparation implemented in operatory room including, the antiseptic (yellow bottle), the soap (pink bottle), the sterile water (clear bottle), the gloves and three cups for skin preparation. The sterile wipe is not present in the picture.

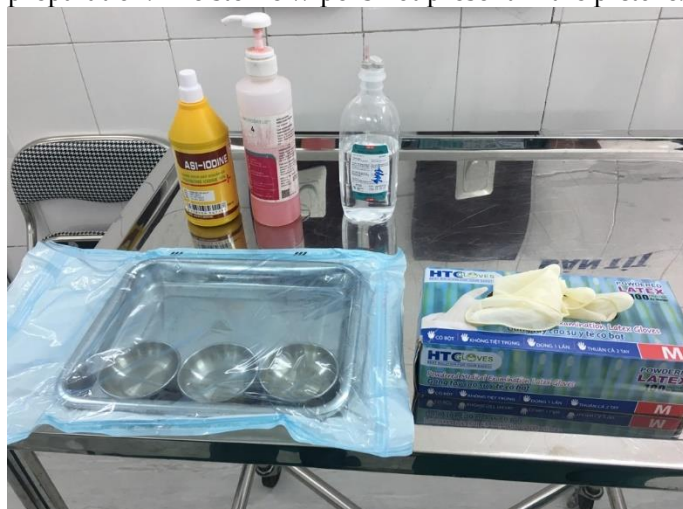

**Figure S2:** Assessment of the preoperative skin preparation

Record ID

Date..... Auditor.....

**Surgical specialty:**

- ☐ Orthopedic
- ☐ Digestive
- ☐ Vascular
- ☐ Urology
- ☐ Ophthalmology
- ☐ Oral Surgery
- ☐ Plastic surgery
- ☐ Neurosurgery

Number of surgical room:

Patient name:

Sex:

Age:

**Kind of surgery:**

- ☐ Programmed
- ☐ Programmed (< 24 h)
- ☐ Emergency

**Intervention**

- ☐ Hip prosthesis
- ☐ Knee prosthesis
- ☐ Osteosynthesis material
- ☐ Other

**Septic surgery**

- ☐ Yes      ☐ No

**Depilation//Preoperative washing****Has the patient undergone depilation?**

- ☐ Yes
- ☐ No
- ☐ Not necessary

**Where was this depilation performed?**

- ☐ At home
- ☐ In service
- ☐ Operating room
- ☐ Preparation room

**How was it done?**

- ☐ Clipper
- ☐ Chemical depilation
- ☐ Shaver
- ☐ Other:

**Did the patient have a pre-operative shower?**

- ☐ Yes
- ☐ No

**When?**

- ☐ The day before
- ☐ The morning

**Before skin preparation****How was hand hygiene performed before wearing gloves?**

- ☐ Completed and compliant
- ☐ Completed but not compliant
- ☐ Not carried out

**Debridement****How was debridement carried out on the operating site?**

- ☐ With non-sterile gloves
- ☐ With sterile gloves

**Which product was used?**

- ☐ PVPI scrub
- ☐ Chlorhexidine scrub
- ☐ Mild soap
- ☐ Other

**Was rinsing performed?**

- ☐ Yes
- ☐ No

**Was drying performed?**

- ☐ Yes
- ☐ No

**Were gloves changed after cleaning?**

- ☐ Yes
- ☐ No

**How was hand hygiene performed upon removing gloves?**

- ☐ Completed and compliant
- ☐ Completed but not compliant
- ☐ Not carried out

**Antiseptis**

**Were sterile gloves used for the first antiseptic application of the operating?**

- ☐ Yes      ☐ No

**Who performed the first antiseptic application?**

- ☐ Surgeon  
☐ Operating aid  
☐ Instrumentalist/Nurse  
☐ Circulating

**Which product was used?**

- ☐ Povidone-iodine (PVP-I )  
☐ Alcoholic PVPI  
☐ Alcoholic chlorhexidine  
☐ Other

**Was the drying time respected?**

- ☐ <30 s  
☐ >30 s

**Was the wide operative field respected?**

- ☐ Yes      ☐ No

**Who performed the second antiseptic application?**

- ☐ Surgeon  
☐ Operating aid  
☐ Instrumentalist/Nurse  
☐ Circulating

**Was the second antiseptic application performed?**

- ☐ Yes      ☐ No

**Were sterile gloves used for the second antiseptic application?**

- ☐ Yes      ☐ No

**Which product was used?**

Povidone iodine

Povidone iodine alcohol

Chlorhexidine alcohol

Other antiseptic

**Was drying time respected?**

<30 s

> 30 s

**Did the antiseptic drips be noticed?**

- ☐ Yes      ☐ No

**Figure S3:** A perioperative checklist assessed the preoperative shower, the medical and surgical treatment and clinical data

Figure S3a : Vietnamese version

Ngày:

Chuẩn bị mổ ngày:

- Giải thích bệnh nhân và gia đình
- Ký cam đoan mổ
- Hoàn thiện hồ sơ xét nghiệm

- Vệ sinh vùng mổ
- Thụt tháo phân nếu cần: - Có - Không
- Ngủ sớm, nhịn ăn sáng ngày phẫu thuật
- Khám tiền mê trước phẫu thuật
- Đo Mạch, nhiệt độ, huyết áp sáng ngày phẫu thuật
- .....

Figure S3b: English version

Date:

Date of surgery :

- Explain to patient and family
- Sign a commitment to surgery
- Completing the examination file
- Cleaning the surgical area
- Enema if necessary: Yes No
- Sleep early, fast for breakfast right after surgery
- Pre-surgery pre-anesthesia examination
- Measure pulse, temperature, blood pressure on the morning of surgery
- ....
